# Supplementary material for: Validity of using multiple imputation for "unknown" stage at diagnosis in population-based cancer registry data
Source: PubMed Central journal article supplement (PMC5487067; doi:10.1371/journal.pone.0180033), 2017-06-27
Supplement: pone.0180033.s002.pdf [file pone.0180033.s002.pdf]

**S1 Table. Comparison of the estimated adjusted hazard ratios (HRs) from multivariable Cox proportional hazard regression models for data with PCOS-stage, NSWCR complete-case stage and imputed stage from two imputation models.**

| Variables                    | Multivariable model - adjusted hazard ratio (95% CI) |                |                           |                |                                               |                |                                                  |               |                                                  |               |
|------------------------------|------------------------------------------------------|----------------|---------------------------|----------------|-----------------------------------------------|----------------|--------------------------------------------------|---------------|--------------------------------------------------|---------------|
|                              | PCOS-stage                                           |                | NSWCR complete-case stage |                | Data generated by multiple imputation         |                |                                                  |               |                                                  |               |
|                              |                                                      |                |                           |                | Data from basic imputation model <sup>a</sup> |                | Data from enhanced imputation model <sup>b</sup> |               | Data from enhanced imputation model <sup>b</sup> |               |
|                              | n=1864                                               |                | n=1254                    |                | m=35<br>n=1864<br>MNAR                        |                | m=35<br>n=1864<br>MAR                            |               | m=100<br>n=1864<br>MAR                           |               |
| <b>Age at diagnosis</b>      | p=0.5                                                |                | p=0.6                     |                | p=0.6                                         |                | p=0.6                                            |               | p=0.6                                            |               |
| One year increase            | 1.01                                                 | (0.98 -1.05)   | 1.01                      | (0.97 -1.06)   | 1.01                                          | (0.97 -1.05)   | 1.01                                             | (0.97 -1.05)  | 1.01                                             | (0.97 -1.05)  |
| <b>Geographical location</b> | p=0.8                                                |                | p=0.05                    |                | p=0.5                                         |                | p=0.4                                            |               | p=0.8                                            |               |
| Major cities                 | 1.07                                                 | (0.64 -1.79)   | 1.80                      | (0.89 -3.67)   | 1.18                                          | (0.69 -2.02)   | 1.22                                             | (0.68 -2.20)  | 1.24                                             | (0.70 -2.21)  |
| Inner regional               | 1.00                                                 |                | 1.00                      |                | 1.00                                          |                | 1.00                                             |               | 1.00                                             |               |
| Rural                        | 1.24                                                 | (0.61 -2.55)   | 2.76                      | (1.18 -6.46)   | 1.57                                          | (0.75 -3.32)   | 1.66                                             | (0.76 -3.64)  | 1.63                                             | (0.75 -3.56)  |
| <b>Socio-economic status</b> | p=0.04                                               |                | p=0.003                   |                | p=0.03                                        |                | p=0.03                                           |               | p=0.03                                           |               |
| High                         | 1.00                                                 |                | 1.00                      |                | 1.00                                          |                | 1.00                                             |               | 1.00                                             |               |
| Middle                       | 0.74                                                 | (0.43 -1.28)   | 0.73                      | (0.35 -1.52)   | 0.83                                          | (0.47 -1.45)   | 0.79                                             | (0.44 -1.41)  | 0.81                                             | (0.46 -1.45)  |
| Low                          | 1.48                                                 | (0.86 -2.53)   | 2.45                      | (1.25 -4.79)   | 1.73                                          | (0.98 -3.04)   | 1.69                                             | (0.94 -3.05)  | 1.75                                             | (0.97 -3.16)  |
| <b>Stage at diagnosis</b>    | p<0.0001                                             |                | p<0.0001                  |                | p<0.0001                                      |                | p<0.0001                                         |               | p<0.0001                                         |               |
| Localised                    | 1.00                                                 |                | 1.00                      |                | 1.00                                          |                | 1.00                                             |               | 1.00                                             |               |
| Regional                     | 2.91                                                 | (1.81 -4.69)   | 2.35                      | (1.28 -4.31)   | 2.31                                          | (1.19 -4.49)   | 2.67                                             | (1.42 -5.04)  | 2.76                                             | (1.48 -5.13)  |
| Distant                      | 22.04                                                | (14.08 -34.52) | 25.71                     | (12.90 -51.23) | 23.54                                         | (11.97 -46.31) | 20.54                                            | (9.55 -44.16) | 20.99                                            | (9.81 -44.92) |

a. Basic imputation model includes NSWCR variables survival status, survival time, age at diagnosis, geographical location, and socio-economic status.

b. Enhanced imputation model includes all variables in the basic imputation model, plus primary treatment from PCOS.

\* NSWCR: NSW Cancer Registry; PCOS: Prostate Cancer Care and Outcomes Study; MNAR: Missing not at random; MAR: Missing at random.
